# Supplementary material
Source: publisher figshare collection journal article supplement (https://tandf.figshare.com/ndownloader/files/22384611)
Supplement: Supplementary file 1 [file 22384611]

**Supplemental Table 1 Food groups used for the analyses and examples of food items belonging to each category**

| <b>Food group energy and nutrients</b> | <b>Food group (poly)phenols</b> | <b>Examples of food item</b>                             |
|----------------------------------------|---------------------------------|----------------------------------------------------------|
| Non-alcoholic beverages                | Non-alcoholic beverages         | carbonated sweetened lemonade                            |
| Juices                                 | Juices                          | apple juice, orange pure juice, peach juice              |
| Fruit                                  | Fruit                           | apple, pear, banana, kiwi                                |
| Nuts                                   | Nuts                            | almonds, walnuts                                         |
| Vegetables                             | Vegetables                      | carrots, cauliflower, eggplants, salad, spinach          |
| Spices & aromatic herbs                | Spices & aromatic herbs         | saffron, common sage, basil                              |
| Potatoes                               | Potatoes                        | potatoes                                                 |
| Pasta and cereals                      | Cereal-based products           | pasta, rice, barley, maize                               |
| Bread, substitutes and pizza           |                                 | common bread, whole grain bread, breadstick              |
| Breakfast cereals                      |                                 | puffed rice, cornflakes                                  |
| Desserts                               |                                 | croissant, butter biscuits, muffins                      |
| Legumes                                | Legumes                         | common beans, chickpeas                                  |
| Fish and shellfish                     | -                               | salmon, tuna, cod, squid                                 |
| Meat                                   | -                               | chicken breast, beef steak, pork chop                    |
| Cured meat                             | -                               | salami, Parma ham, baked ham                             |
| Eggs                                   | -                               | chicken eggs                                             |
| Milk and yogurt                        | -                               | regular milk, low-fat milk, regular yogurt, fruit yogurt |
| Dairies                                | -                               | Parmesan cheese, mozzarella, ricotta cheese              |
| Animal fats                            | -                               | butter, cream                                            |
| Vegetable fats and oils                | Vegetable fats and oils         | extra virgin olive oil, olive oil                        |
| Cocoa-based products                   | Cocoa-based products            | dark chocolate bar, milk chocolate bar, cocoa powder     |
| Tea and coffee (decaffeinated)         | Tea and coffee (decaffeinated)  | green tea, black tea, decaffeinated coffee               |
| Others                                 | Others                          | vegetable broth, meat broth                              |
|                                        | Olive                           | black olive, green olive                                 |
